# Supplementary material
Source: MDPI journal article supplement (https://www.mdpi.com/2311-7524/7/8/231)
Supplement: s1 [file s1]

Table S1 Primers used for qRT-PCR

| Gene           | Forward (5'-3')          | Reverse(5'-3')           |
|----------------|--------------------------|--------------------------|
| <i>CmGST1</i>  | CCAAAAATGGGTGGTAAAA      | TAAGATCCGCAAGGGTGAA      |
| <i>CmGST2</i>  | AGGAGGCGACATGGGTAG       | TTATGACGGCGAAAAAGC       |
| <i>CmGST3</i>  | ACTTGGTTGGTCCTATTG       | GTGGGTTGTACTTCTTGC       |
| <i>CmGST4</i>  | ATACGCAAACAAAGGAAC       | TCAGCCATAGTGAACCTCG      |
| <i>CmGST5</i>  | TCATCCATTCGGTCAAGT       | GTCCAGCTAAATACGTTGC      |
| <i>CmGST6</i>  | TTGGAGGGAGTTCTTGAC       | CAACTAACATAGCCACAGA      |
| <i>CmGST7</i>  | GTTCCGCTTTCTTCTTTG       | GTGTTCTGGTATGCCTTG       |
| <i>CmGST8</i>  | ATTAGCGGATCTTCATC        | ACTAAGAGGGCAACAAT        |
| <i>CmGST9</i>  | TCCAGCGTTTGAGGATG        | TTCCAACCATCGGCTTA        |
| <i>CmGST10</i> | CTACATCCATCCACACAG       | AGAGCGATCACACAATAC       |
| <i>CmGST11</i> | TCAATGCACATTCACAAC       | AGGAGATACTTTACGCT        |
| <i>CmGST12</i> | GAGGCATACGCCGACAAG       | CAACTAACATAGCCACAGA      |
| <i>CmGST13</i> | GTTTGTGCCCATTAGTTT       | CGGTTTGTATAGCCGATT       |
| <i>CmGST14</i> | GTGGATGGAAGTGGA AAA      | CATGCGCTAACATGTGGT       |
| <i>CmGST15</i> | GAGGCATACGCCGACAAG       | GAAGATCCGCCAATGTGA       |
| <i>CmGST16</i> | ACTCTTCGTGTCCTGCTT       | TCTAATACCACCATCCTC       |
| <i>CmMYB6</i>  | ATGGGGGAGTACAGAAAAATG    | TCATAGTTGGTCCGAATTTA     |
| <i>CmbHLH2</i> | GTGAAGGTGAAGGGTATTAGGGGG | CTCTTCAAACGTCCTTCACATACC |
| <i>CmActin</i> | CACCCCCAGAGAGAAAAATAC    | ATCTGTTGGAAGGTGCTGAG     |
| <i>NtCHS</i>   | TTGTTCGAGCTTGTCTCTGC     | AGCCCAGGAACATCTTTGAG     |
| <i>NtCHI</i>   | GTCAGGCCATTGAAAAGCTC     | CTAATCGTCAATGCCCCAAC     |
| <i>NtF3H</i>   | CAAGGCATGTGTGGATATGG     | TGTGTCGTTTCAGTCCAAGG     |
| <i>NtDFR</i>   | AACCAACAGTCAGGGGAATG     | TTGGACATCGACAGTTCCAG     |
| <i>NtANS</i>   | TGGCGTTGAAGCTCATACTG     | GGAATTAGGCACACACTTTGC    |
| <i>NtUFGT</i>  | GAGTGCATTGGATGCCTTTT     | CCAGCTCCATTAGGTCCTTG     |
| <i>NtAn1a</i>  | ACCATTCTCGAACACCGAAG     | TGCTAGGGCACAATGTGAAG     |

|                |                                            |                                             |
|----------------|--------------------------------------------|---------------------------------------------|
| <i>NtAn1b</i>  | CTTGAACACTTCTCAAACCGA                      | TGCTAGGGCACAATGTGAAG                        |
| <i>NtAn2</i>   | AGGTGACACTATAGAATAAACCTCCACTTGG<br>GTTTCCT | GTACGACTCACTATAGGGACCCCCTGAGTCC<br>TGACTGTA |
| <i>NtActin</i> | AATGGAACTGGAATGGTCAAGGC                    | TGCCAGATCTTCTCCATGTCATCCCA                  |

Table S2 Primers used for vector construction

|             | Forward (5'-3')                                  | Reverse(5'-3')                                    |
|-------------|--------------------------------------------------|---------------------------------------------------|
| CmGST1-SK   | AGAACTAGT <u>GGATCC</u> ATGGTAGTTAAGGT<br>ATATGG | GGTATCGATA <u>AAGCTT</u> TTAGCCCATTAGTATC<br>ATAA |
| CmGST1-LUC  | CAGCCCGGG <u>GGATCC</u> GCTTGTCCAAGTCA<br>TGAGTG | CTTGAATTC <u>GAGCTC</u> GCTTGTCCAAGTCAT<br>GAGTG  |
| CmGST1-eGFP | ACGGGGGAC <u>GAGCTC</u> ATGGTAGTTAAGGT<br>ATATGG | GCTCACCAT <u>GTCGAC</u> GCCCATTAGTATCATA<br>ACTT  |

Note: Added restriction enzyme sites are underlined

Table S3 *Cis*-elements in promoter of *CmGST1*

| Motif Name  | Location in promoter                                   | Sequence | Function             |
|-------------|--------------------------------------------------------|----------|----------------------|
| CGTCA-motif | -595                                                   | CGTCA    | MeJA-responsiveness  |
| MYB         | -530, -1763                                            | TAACCA   |                      |
| GT1-motif   | -193, -531, -1762                                      | GGTTAA   | light responsiveness |
| G-Box       | -883, -1294, -1366 -949,<br>-961, -1019, -1103, -1139, | CACGTT   | light responsiveness |

|                      |                                                                                                        |                 |                              |
|----------------------|--------------------------------------------------------------------------------------------------------|-----------------|------------------------------|
|                      | -1163, -1175, -1211, -1235,<br>-1246, -1282                                                            | TACGTG          |                              |
| ABRE                 | -883, -949, -961, -1020,<br>-1104, -1140, -1164, -1176,<br>-1212, -1236, -1247, -1283,<br>-1295, -1367 | ACGTG           | abscisic acid responsiveness |
| TGA-<br>element      | -1520                                                                                                  | AACGAC          | auxin-responsive element     |
| ARE                  | -473, -636, -680, -1570                                                                                | AAACCA          | anaerobic induction          |
| MYB-like<br>sequence | -530, -1763                                                                                            | TAACCA          |                              |
| GATA-motif           | -1054                                                                                                  | AAGATAAGATT     | light responsive element     |
| MYC                  | -75, -312, -1332, -1485,<br>-1767                                                                      | CATGTG<br>CATTG |                              |

---
